# Supplementary material for: The Translated Amino Acid Sequence of an Insertion in the Hepatitis E Virus Strain 47832c Genome, But Not the RNA Sequence, Is Essential for Efficient Cell Culture Replication
Source: MDPI journal article supplement (doi:10.3390/v13050762), 2021-04-26
Supplement: s1 [file s1]

# Supplementary Materials: The Translated Amino Acid Sequence of an Insertion in the Hepatitis E Virus Strain 47832c Genome, but Not the RNA Sequence, Is Essential for Efficient Cell Culture Replication

**Table S1.** Details on the generated plasmids carrying deletions, sequence substitutions and point mutations.

| Construct               | Nucleotide Position in HEV 47832c (KC618403.1) | Modification                                                                           | GenBank Accession Number |
|-------------------------|------------------------------------------------|----------------------------------------------------------------------------------------|--------------------------|
| p47832mc                | -                                              | -                                                                                      | MN756606.1               |
| p47832/ $\Delta$ ins1+2 | 2255-2440                                      | Deleted                                                                                | MW573944                 |
| p47832/ $\Delta$ ins1   | 2255-2368                                      | Deleted                                                                                | MW573945                 |
| p47832/ $\Delta$ ins2   | 2369-2440                                      | Deleted                                                                                | MW573946                 |
| p47832/SynCod           | 2255-2440                                      | Exchanged with synonymous codons                                                       | MW573955                 |
| p47832/frameshift       | 2255<br>2440/2441                              | C deleted<br>C inserted                                                                | MW573948                 |
| p47832/Ins-Change       | 2255-2440                                      | Exchanged with nt 2369-2440 followed by 2255-2368 of the HEV 47832c genome             | MW573953                 |
| p47832/GFP-186bp        | 2255-2440                                      | Exchanged with GFP-encoding region nt 1166-1351 (MN623123.1)                           | MW573949                 |
| p47832/S17-174bp        | 2273-2446                                      | Exchanged with human ribosomal S17 subunit (nt 2274-2447 from Kernow-C1, (HQ709170.1)) | MW573954                 |
| p47832/GR-ins           | 2375                                           | G exchanged with A                                                                     | MW573950                 |
| p47832/GR-RdRp          | 5116                                           | G exchanged with A                                                                     | MW573952                 |
| p47832/GR-ins+RdRp      | 2375, 5116                                     | G exchanged with A, each                                                               | MW573951                 |

**Table S2.** Primers used in this study.

| <b>Amplicon</b>                | <b>Forward Primer (5'–3')</b> | <b>Reverse Primer (5'–3')</b> |
|--------------------------------|-------------------------------|-------------------------------|
| Sequencing of HVR<br>fragment  | AgCTTATgAAggCTCTgAggTTgA      | gTTgggTggAAAgACTCggg          |
| Sequencing of RdRp<br>fragment | gTCCTCTgTAgCgACTACC           | AACATgCCAATAAaggTTATgTACC     |
